# Supplementary material
Source: publisher figshare collection journal article supplement (https://frontiersin.figshare.com/ndownloader/files/24058118)

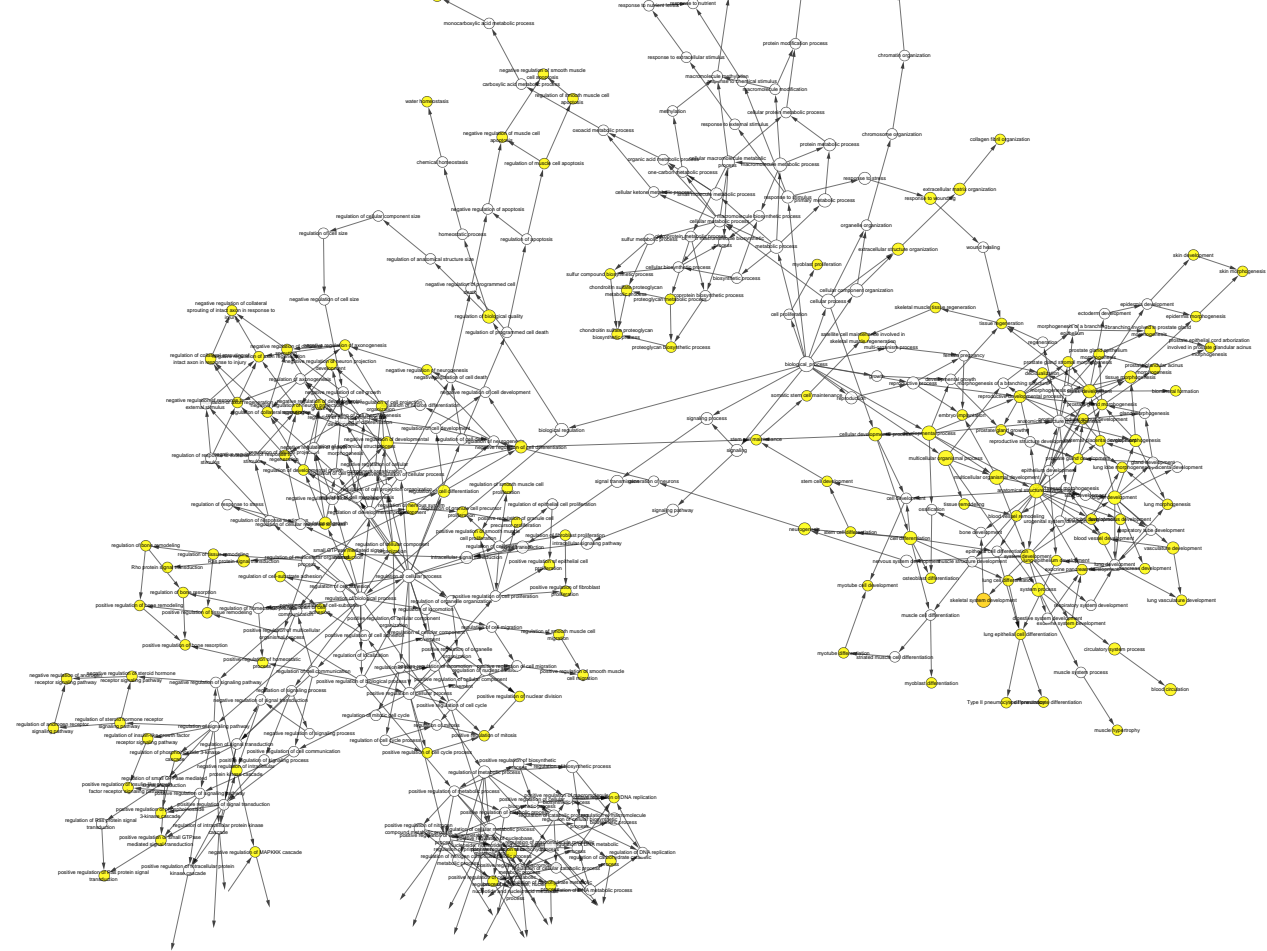

Supplement: Supplementary file [file 24058118]
